# Supplementary material
Source: PubMed Central journal article supplement (PMC1480457)

# Male HY bd

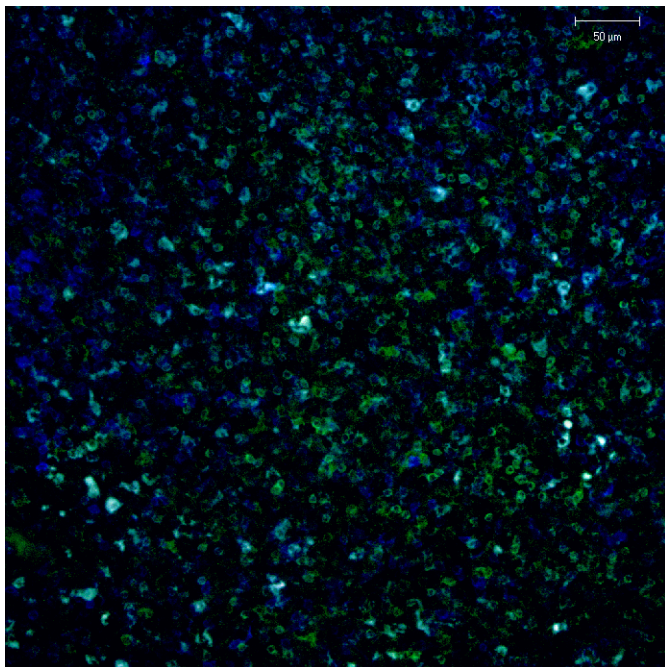

CD8 (green) APA1/1 (red) CD4 (blue)

Supplement: pnas_0601785103_1.pdf [file pnas_0601785103_1.pdf]

A

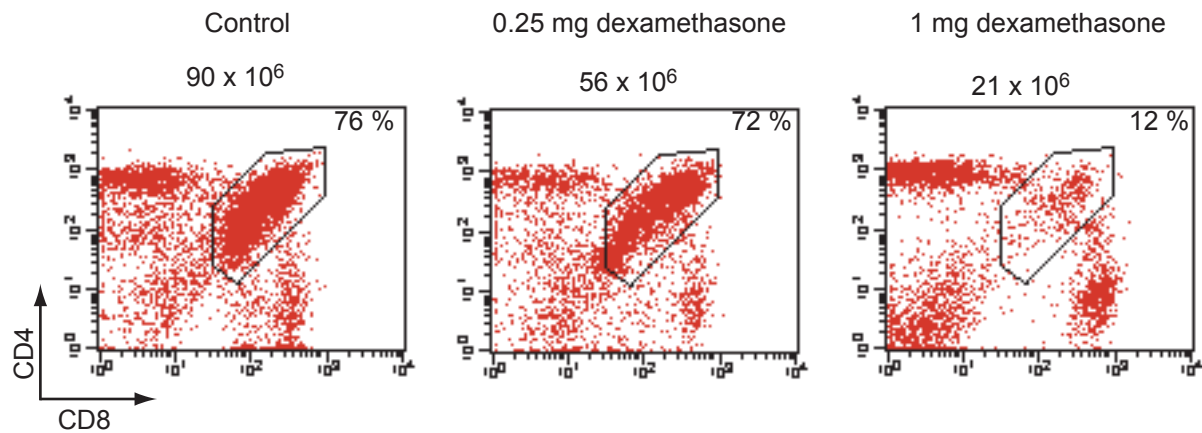

B

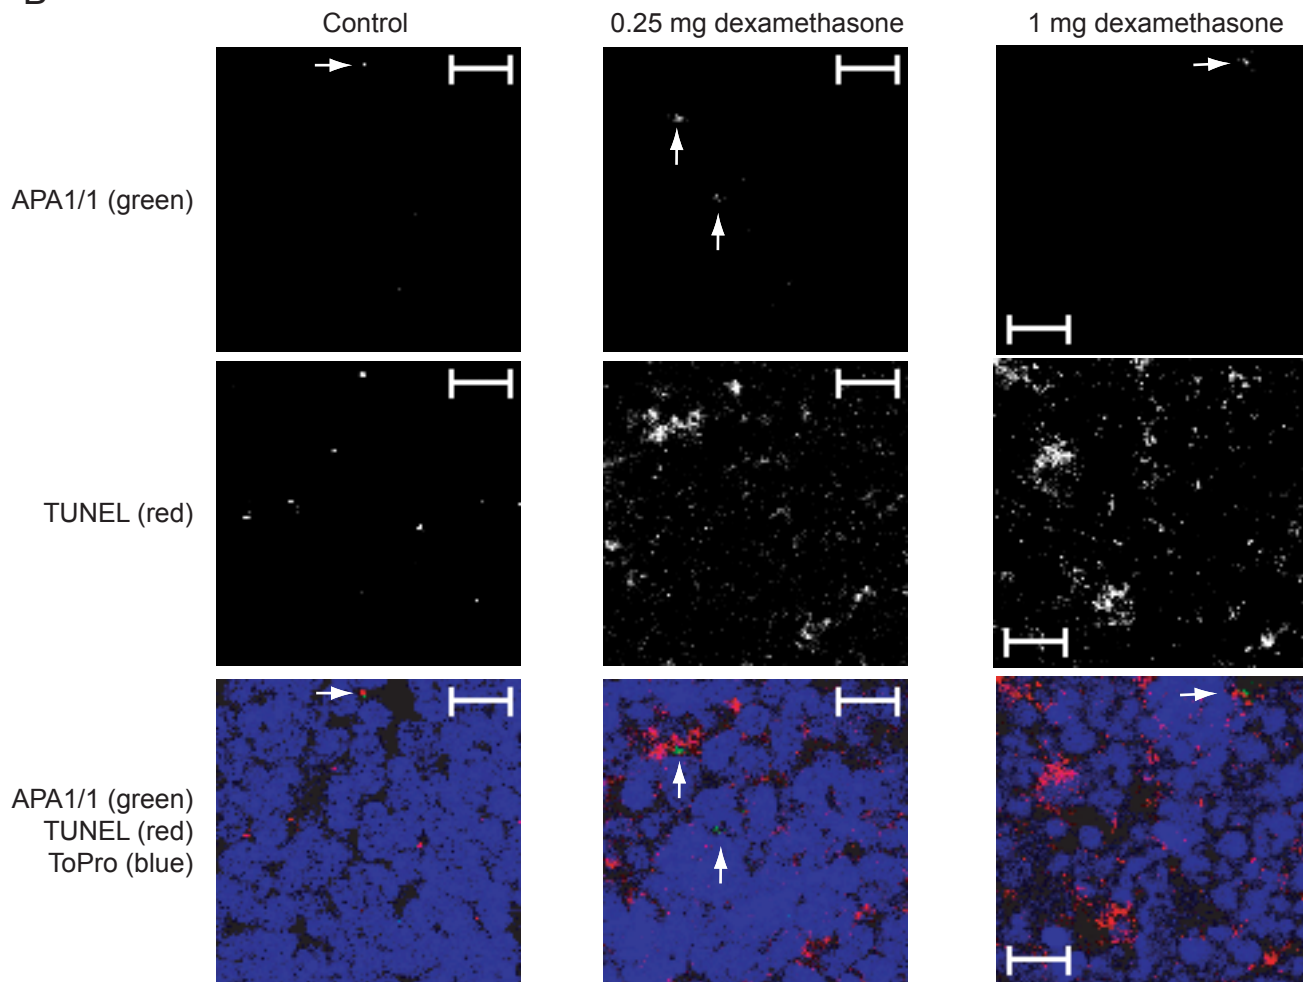

Supplement: pnas_0601785103_2.pdf [file pnas_0601785103_2.pdf]
